# Supplementary material for: Effect of carbon nanotubes on morphology evolution of polypropylene/polystyrene blends: understanding molecular interactions and carbon nanotube migration mechanisms
Source: Royal Society of Chemistry journal article supplement (doi:10.1039/c7ra11390k), 2017-01-01
Supplement: c7ra11390k1.pdf [file c7ra11390k1.pdf]

**Supporting information**

**Effect of Carbon Nanotube on Morphology Evolution of Polypropylene/Polystyrene  
Blends: Understanding Molecular Interactions and Carbon Nanotube Migration  
Mechanisms**

Ivonne Otero Navas, Soheil Sadeghi, Mohammad Arjmand and Uttandaraman Sundararaj\*  
Department of Chemical and Petroleum Engineering, University of Calgary  
Calgary, Alberta, Canada T2N 1N4

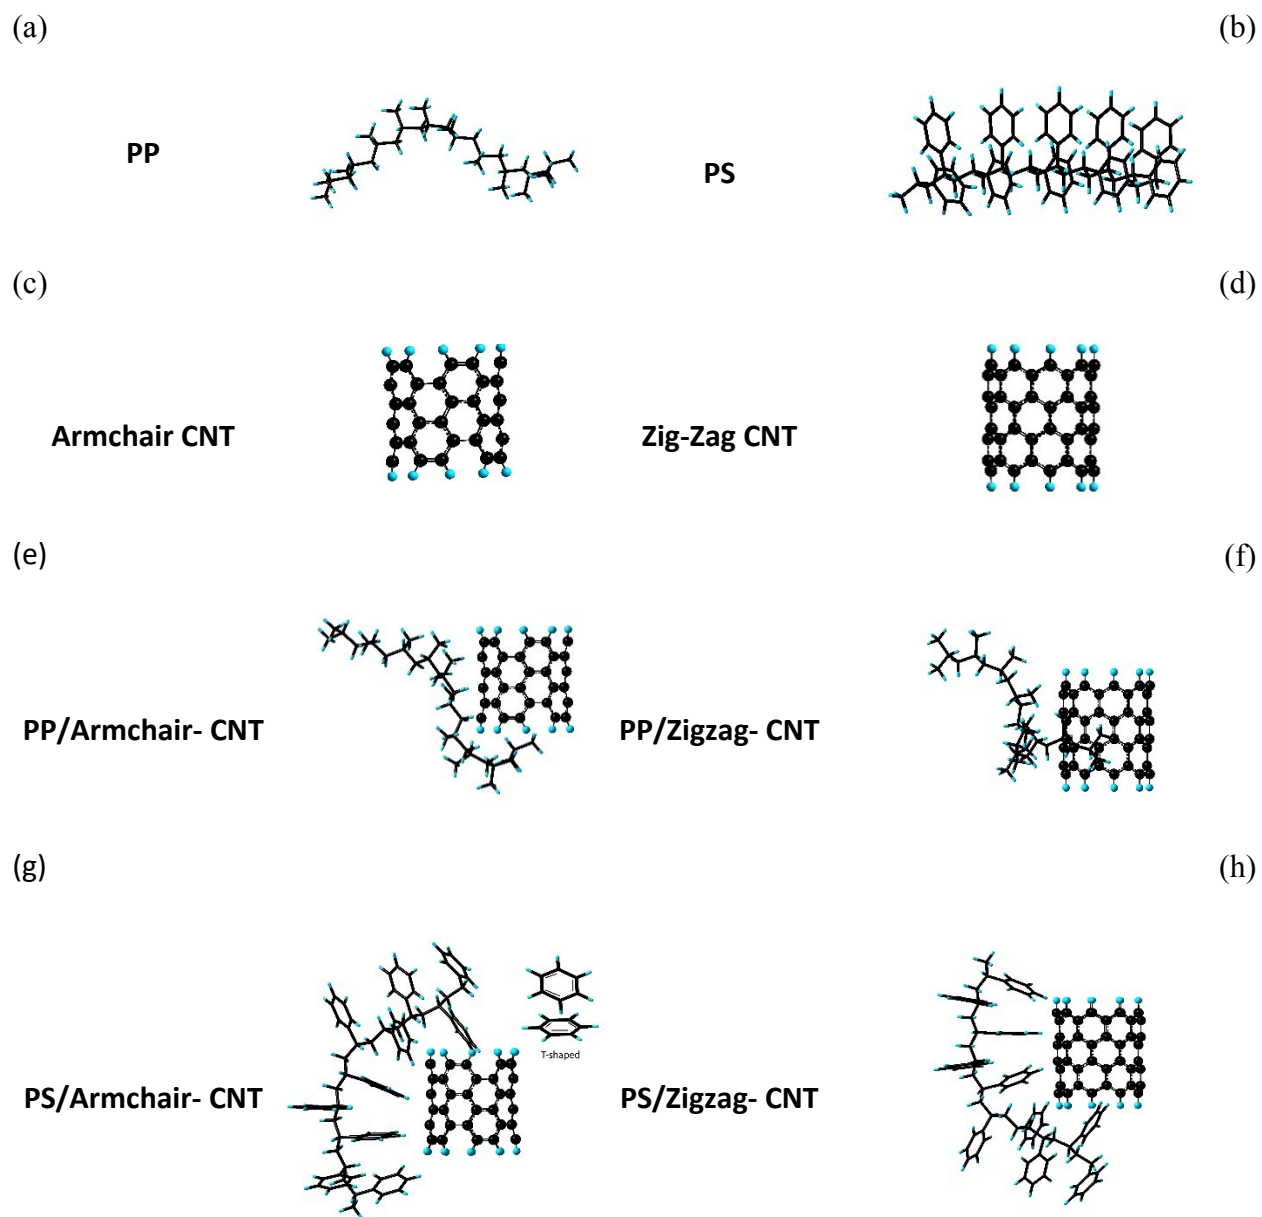

**Figure S1.** Ground state geometries of PP, PS, Armchair-CNT, Zigzag-CNT, PP/CNT and PS/CNT systems.

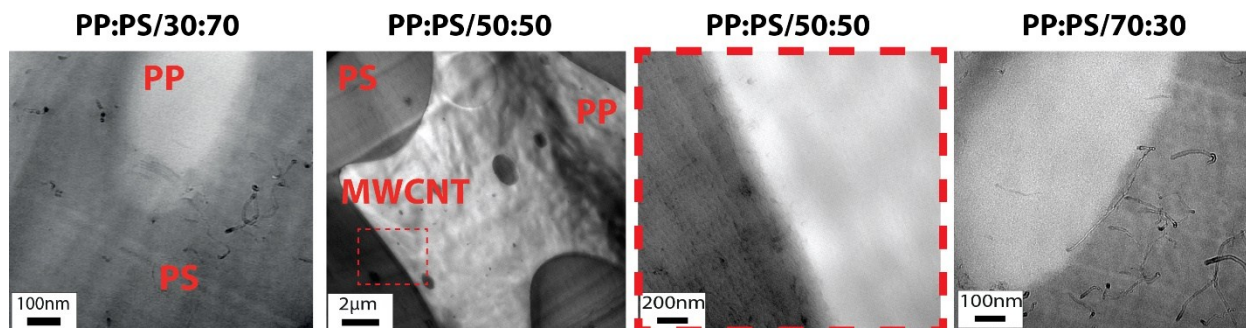

**Figure S2.** TEM images of 1.0 vol.% MWCNT filled blends PP:PS/30:70, PP:PS/50:50 and PP:PS/70:30.

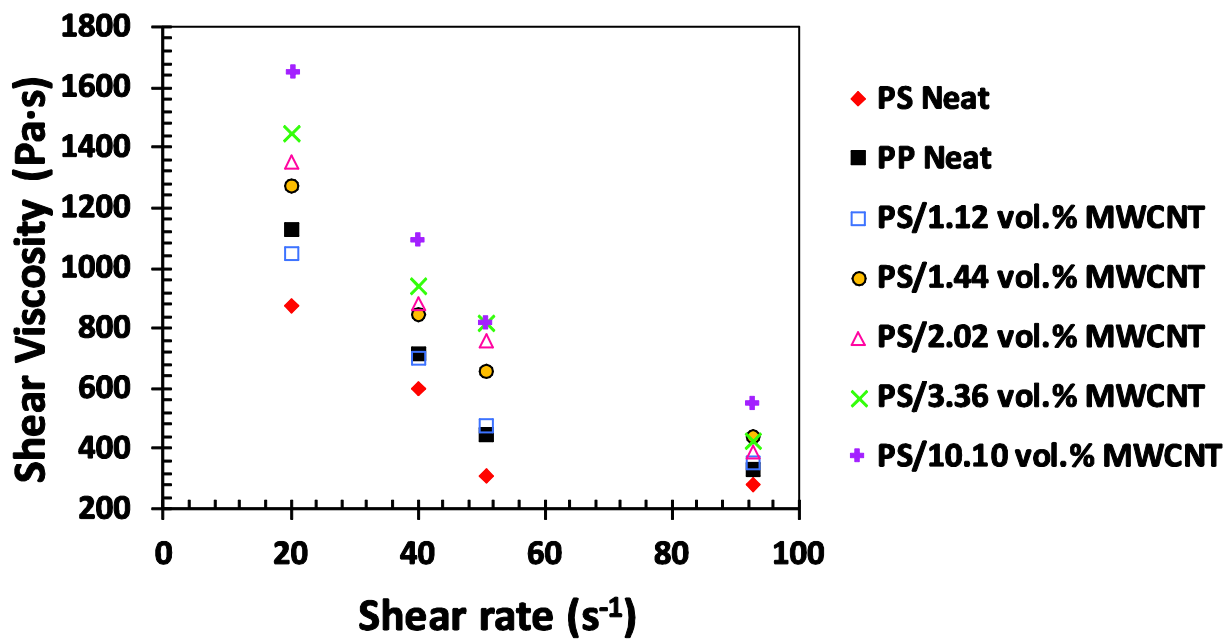

**Figure S3.** Shear viscosity as function of shear rate measured by capillary rheometry as a function of shear rate.

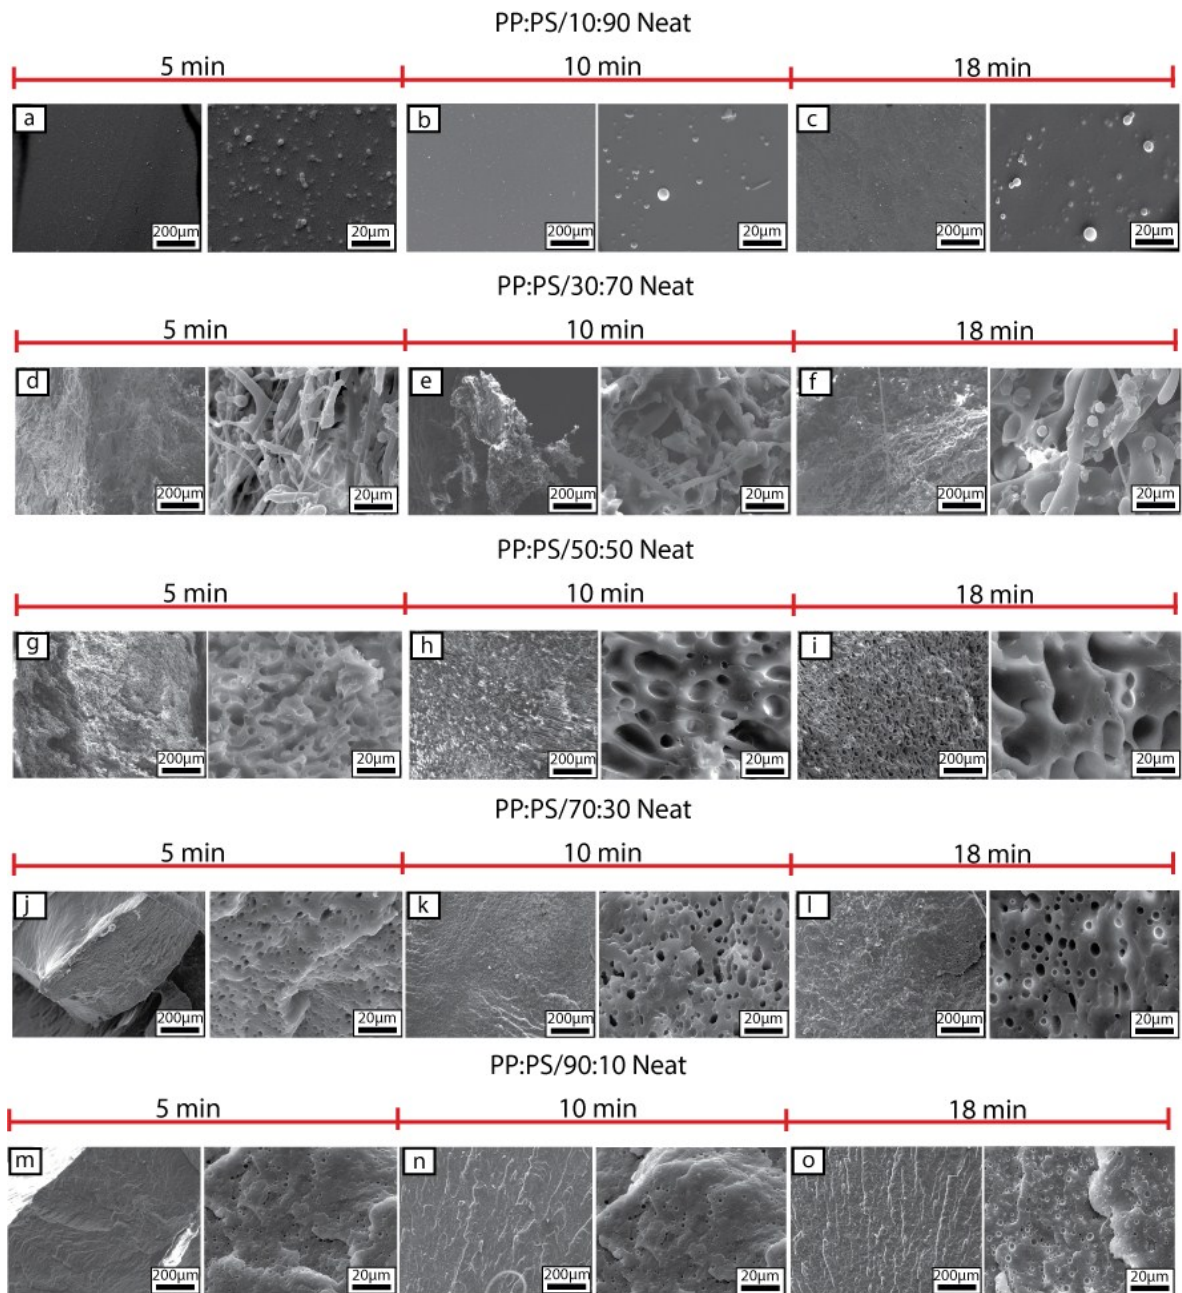

**Figure S4.** Morphology development of neat blends from 5min to 18min of mixing.

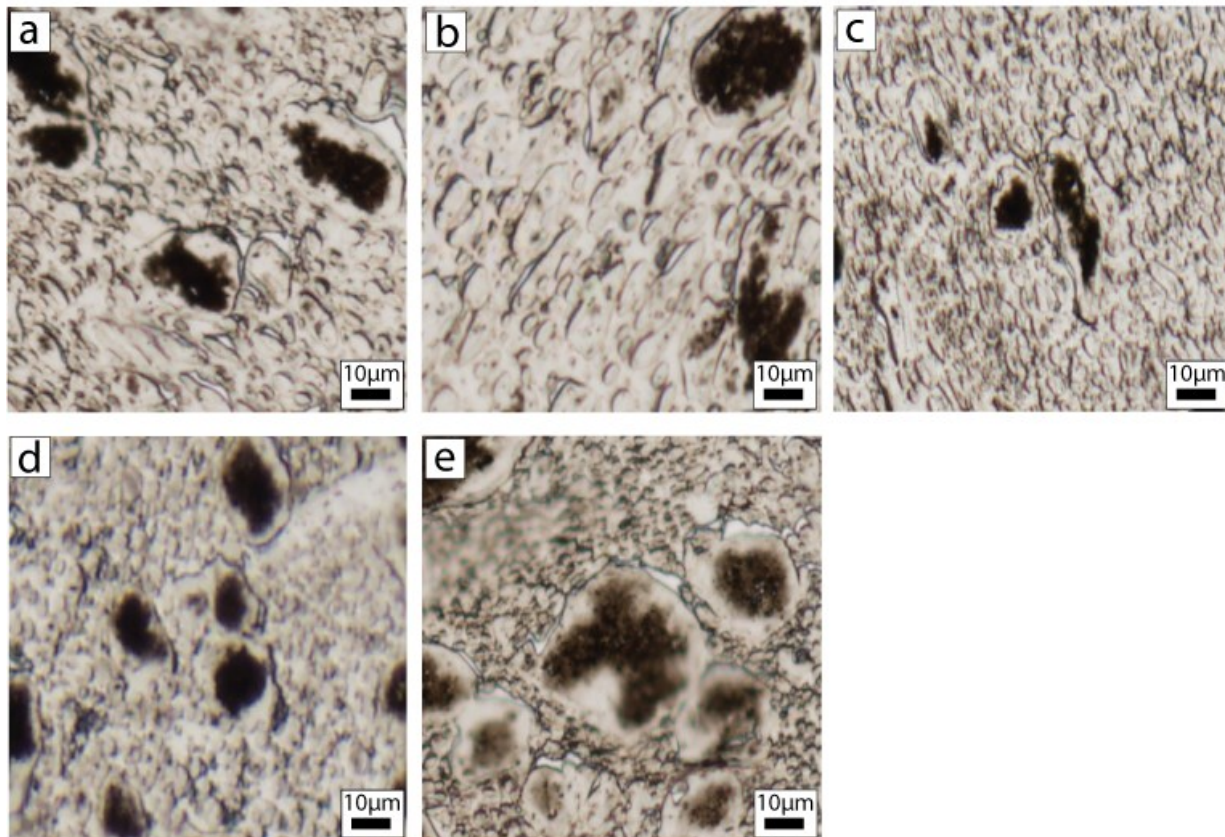

**Figure S5.** Light optical micrographs of PP:PS/50:50/MWCNT 1.0 vol.% morphology development inside the batch mixer at a) 3.5min, b) 4min, c) 6min, d) 8min, and e) 18 min of mixing. The black inclusions correspond to MWCNT.
